# Supplementary material for: Sustainability in Internal Medicine: A Year-Long Ward-Wide Observational Study
Source: MDPI journal article supplement (doi:10.3390/jpm14010115), 2024-01-20
Supplement: s1 [file s1]

## **Supplemental material to**

### **Sustainability in internal medicine: a year-long ward-wide observational study**

Giuseppe A. Ramirez<sup>1,2,3</sup>, Sarah Damanti<sup>2,3</sup>, Pier Francesco Caruso<sup>2,3</sup>, Francesca Mette<sup>2,3</sup>, Gaia Pagliula<sup>2,3</sup>, Adriana Cariddi<sup>1,2,3</sup>, Silvia Sartorelli<sup>1,2,3</sup>, Elisabetta Falbo<sup>2,3</sup>, Raffaella Scotti<sup>3</sup>, Gaetano Di Terlizzi<sup>3</sup>, Lorenzo Dagna<sup>1,2</sup>, Luisa Praderio<sup>3</sup>, Maria Grazia Sabbadini<sup>2,3</sup>,  
Enrica P. Bozzolo<sup>3</sup>, Moreno Tresoldi<sup>3</sup>

1) Unit of Immunology, Rheumatology, Allergy and Rare Diseases, IRCCS Ospedale San Raffaele, Milan, Italy

2) Università Vita-Salute San Raffaele, Milan, Italy

3) Unit of General Medicine and Advanced Care, IRCCS Ospedale San Raffaele, Milan, Italy

**Table S1: factors associated with in-hospital mortality in the training subset on univariate analysis (N=726)**

| <b>Variable</b>                                  | <b>Hazard ratio</b> | <b>95% CI</b> | <b>p</b> |
|--------------------------------------------------|---------------------|---------------|----------|
| Age (years)                                      | 1.04                | 1.02-1.07     | <0.001   |
| ADL/IADL dependance                              | 1.82                | 1.16-2.87     | 0.010    |
| Cardiovascular disorder                          | 1.83                | 1.07-3.13     | 0.027    |
| Hypertension                                     | 1.73                | 1.09-2.73     | 0.019    |
| Immune-mediated disorders                        | 0.38                | 0.17-0.83     | 0.016    |
| End stage cancer                                 | 2.31                | 1.25-4.27     | 0.008    |
| Admitted from nursing home<br>residencies or ICU | 0.31                | 0.14-0.70     | 0.005    |
| Circulation support with at least<br>one drug    | 8.97                | 4.09-19.69    | <0.001   |
| Average NEMS                                     | 1.06                | 1.02-1.12     | 0.007    |
| Average total CIRS                               | 1.09                | 1.05-1.13     | <0.001   |
| Average CIRS-SI                                  | 3.24                | 1.92-5.49     | <0.001   |
| Average CIRS-CI                                  | 1.23                | 1.11-1.36     | <0.001   |
| Number of exits from the Unit                    | 0.82                | 0.74-0.90     | <0.001   |

**Table S2: correlations with length of stay in the training cohort (N=645)**

| <b>Variable</b>                           | <b>Rho</b> | <b>p</b> |
|-------------------------------------------|------------|----------|
| <i>Individual variables</i>               |            |          |
| Non-standard in-ward procedures           | 0.240      | <0.001   |
| Exits from the Unit                       | 0.239      | <0.001   |
| Average NEMS                              | 0.173      | <0.001   |
| Number of Non-standard in-ward procedures | 0.272      | <0.001   |
| Number of Exits from the Unit             | 0.622      | <0.001   |
| <i>Unit-related variables</i>             |            |          |
| Unit average length of hospitalisation    | 0.079      | 0.046    |
| Unit number of discharged patients        | -0.138     | 0.001    |
| Unit average infected patients            | 0.087      | 0.027    |
| Unit average NIMV users                   | 0.117      | 0.003    |
| Physician/patient ratio                   | 0.117      | 0.003    |

**Table S3: factors associated with the first nosocomial infection in the training subset on univariate analysis (N=681)**

| <b>Variable</b>                            | <b>Hazard ratio</b> | <b>95% CI</b> | <b>p</b> |
|--------------------------------------------|---------------------|---------------|----------|
| Age                                        | 1.03                | 1.02-1.05     | <0.001   |
| Cardiovascular disorders                   | 1.73                | 1.06-2.82     | 0.029    |
| Hypertension                               | 1.56                | 1.02-2.42     | 0.041    |
| Cardiac disorders                          | 1.73                | 1.13-2.66     | 0.012    |
| Upper gastrointestinal tract disorders     | 2.59                | 1.54-4.35     | <0.001   |
| Average total CIRS                         | 1.08                | 1.04-1.12     | <0.001   |
| Average CIRS-SI                            | 2.83                | 1.60-5.00     | <0.001   |
| Average CIRS-CI                            | 1.23                | 1.10-1.37     | <0.001   |
| Average NEMS                               | 1.06                | 1.01-1.11     | 0.019    |
| Any oxygen support                         | 1.74                | 1.10-2.74     | 0.018    |
| Circulation support with at least one drug | 4.67                | 1.14-19.13    | 0.032    |
| Number of non-standard in-ward procedures  | 1.61                | 1.01-1.33     | 0.032    |

Figure S1: patients and variables

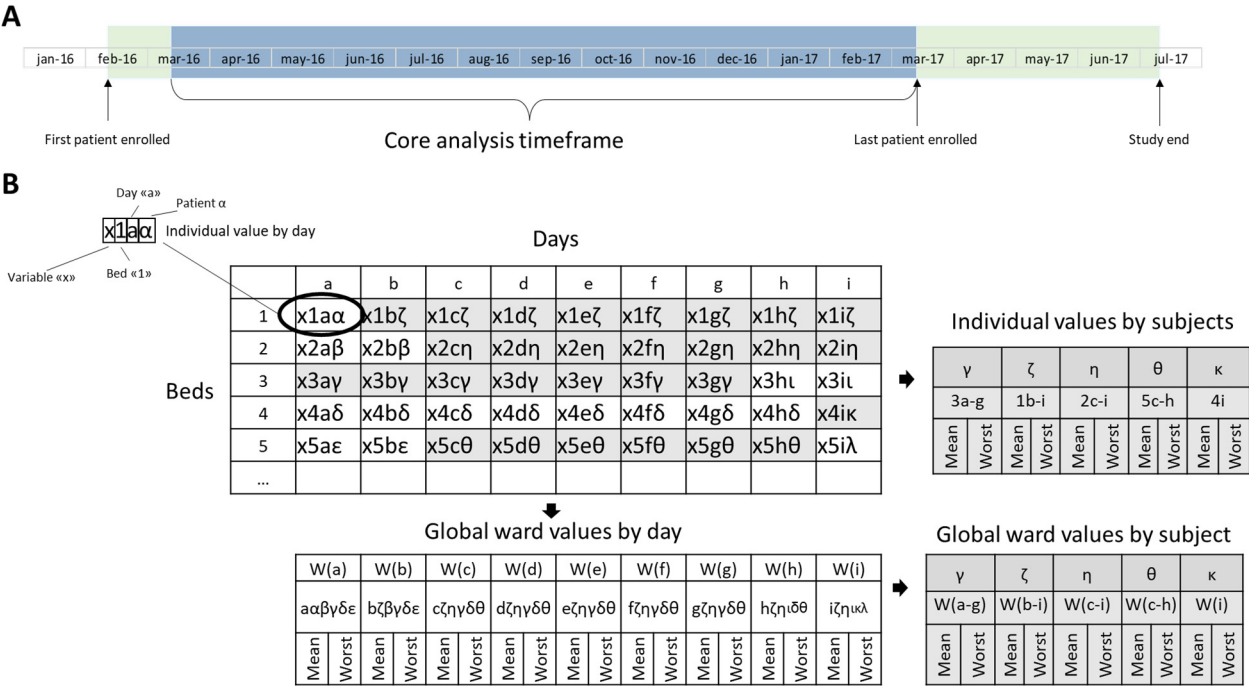

This figure shows the main methodological principles supporting data collection for this work. Panel A depicts the total duration of the study (green) and the core timeframe for data collection (blue). In panel B a schematic representation of the algorithm to obtain a set of derived variables from a given “x” source variable is provided. In this set of graphs, patients are labelled with Greek letters, days by Latin letters and beds by numbers. Grey cells refer to a subset of subjects (γ, ζ, η, θ, κ) to be analysed for variable “x”, white cells to patients being admitted before or after subject γ, ζ, η, θ, κ (α, β, δ, ε, ι, λ) and excluded from analysis. For any x variable, individual patient data were collected day by day (legend in the upper left corner). The mean and worst “x” scores were also calculated ward-wide on a daily basis, by integrating data from all inpatients in a given day (lower left sub-table). Intraindividual variations in “x” values were captured by mean and worst individual “x” throughout each patient specific hospitalisation interval (upper right sub-table). The mean and worst “x” values of the whole unit were also differentially calculated for each subject according to each subject’s individual hospitalisation timeframe (lower right sub-table).

**Figure S2: patient-related variables**

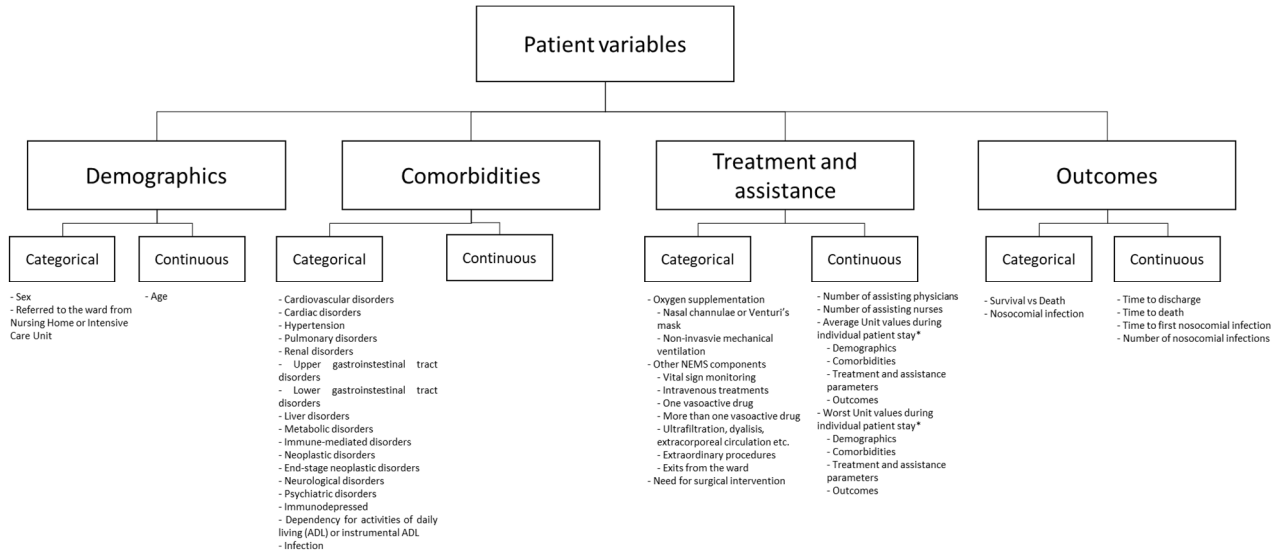

Schematic diagram showing a breakdown of patient-related variables by topic (demographics, comorbidities, treatment and assistance, outcomes) and type (categorical vs continuous variables).

\* Please refer to figure S1 and the main text for the calculation of patient-referred Unit average and worst values.

**Figure S3: correlation between predicted and real hospitalisation length**

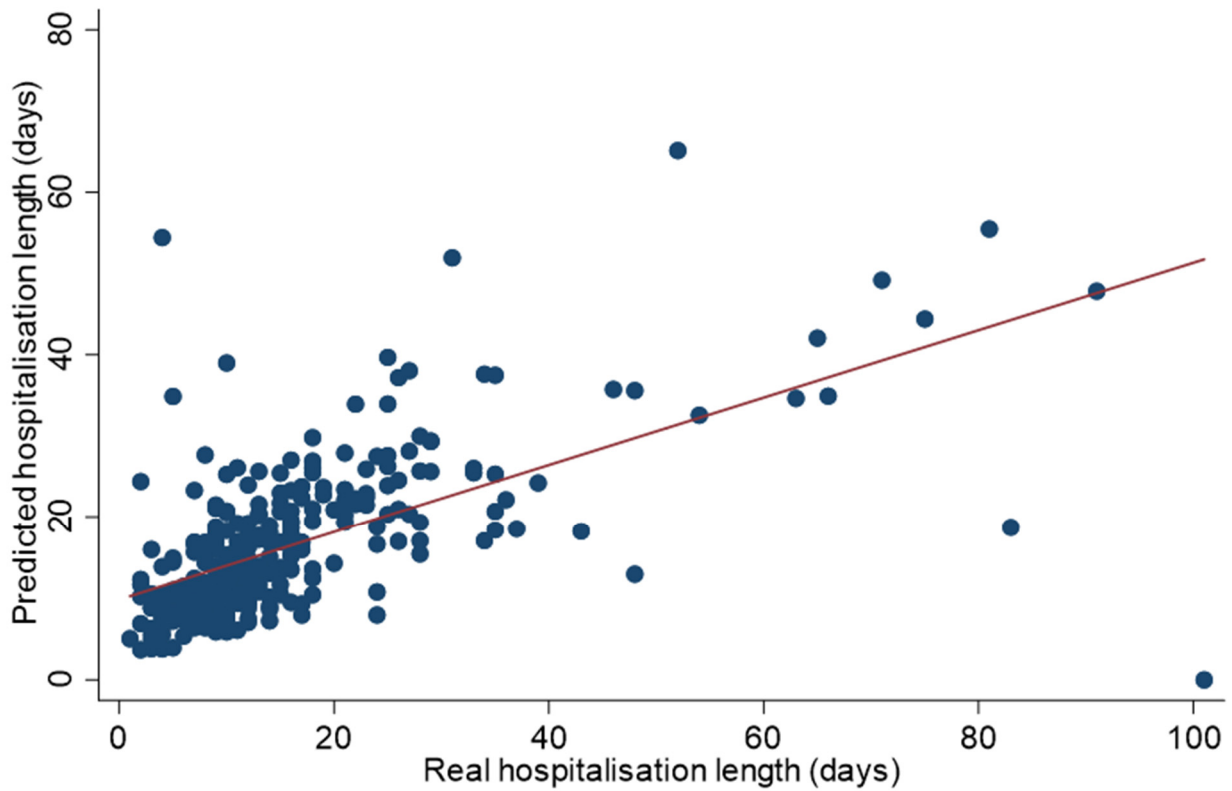

This graph shows the relation among predicted lengths of hospitalisation calculated in the validation subset based on multivariate analysis in the training subset and measured hospitalisation lengths in the same subset.
